# Supplementary material for: Organic thermoelectric films: achieving high conductivity and power factor through sulfonated-poly(3,4-ethylenedioxythiophene) and single-walled carbon nanotube composites
Source: Royal Society of Chemistry journal article supplement (doi:10.1039/d5tc03290c), 2025-12-02
Supplement: d5tc03290c1.pdf [file d5tc03290c1.pdf]

Supplementary Information

**Organic Thermoelectric Films: Achieving High Conductivity  
and Power Factor Through Sulfonated-Poly(3,4-  
ethylenedioxythiophene) and Single-Walled Carbon Nanotube  
Composites.**

Maël Idir †, Guillaume Chamelot †, Yinghui He,<sup>‡</sup> Thomas Lemieux †, Kendra Bueley, <sup>‡</sup>Serge Beaupré †, Salima Alem, <sup>‡</sup>Jianping Lu, <sup>‡</sup>Jean-François Morin †, Mario Leclerc \*†

AUTHOR ADDRESS

†Département de Chimie and Centre de recherche sur les matériaux avancés (CERMA), Université Laval, Québec City, Québec G1V 0A6, Canada

<sup>‡</sup> Quantum and Nanotechnologies Research Centre, National Research Council Canada, Ottawa, Ontario, K1A0R6, Canada

## UV-Vis analysis and fluorescence

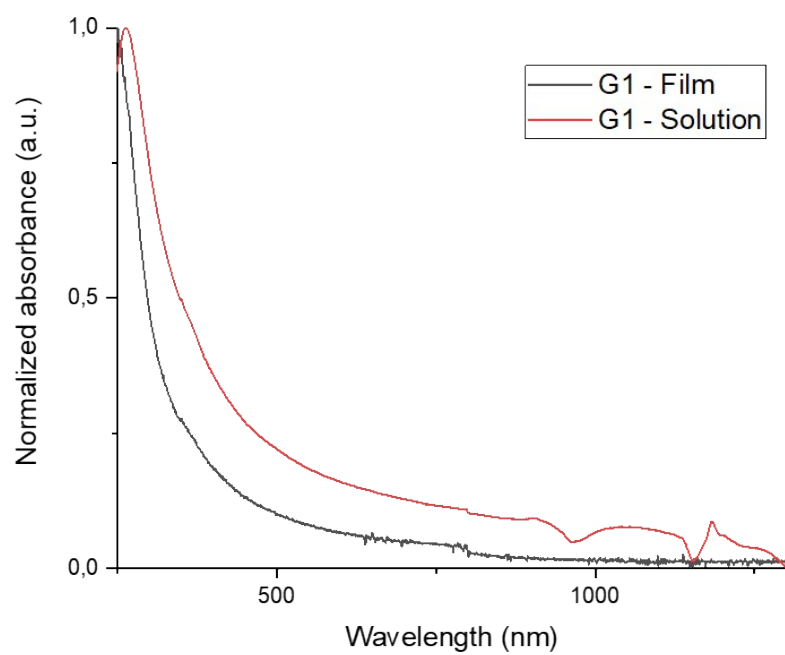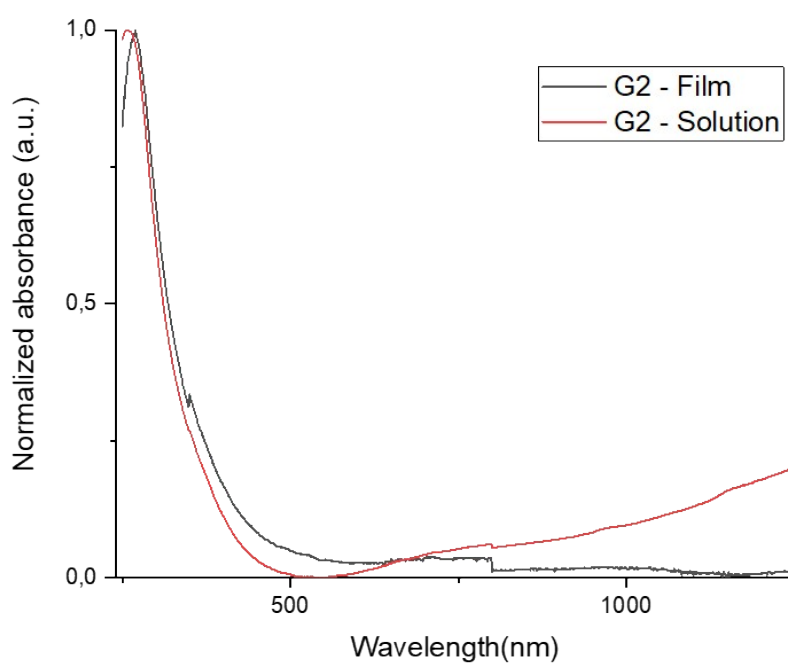

**Figure S1: UV-Vis Spectra of the G1 and G2 composite both in film and solution**

No fluorescence spectra have been recorded due to the fact that the sample were not active in fluorescence.

## Thermal conductivity

The obtained pellet presents a rough surface, which may affect the LFA test. The LFA test was performed 16 times on the carbon-based sample. The quality of the fit was 90% or higher and the average thermal diffusivity value was found to be  $0.0025 \text{ cm}^2 \text{ s}^{-1}$ . It was only possible to obtain the average thermal diffusivity value of the carbon-based sample. This is because the quantity of carbon-based sample was only enough to produce 1mm thick pellet. This limitation does not allow direct comparison with the graphite reference sample which is 2mm thick. In order to obtain the  $C_p$  value, 2mm thick pellets are required.

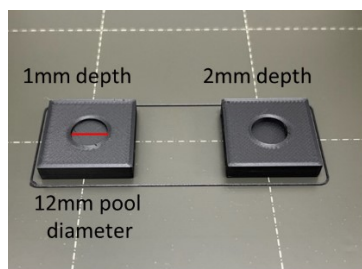

3D printed pools

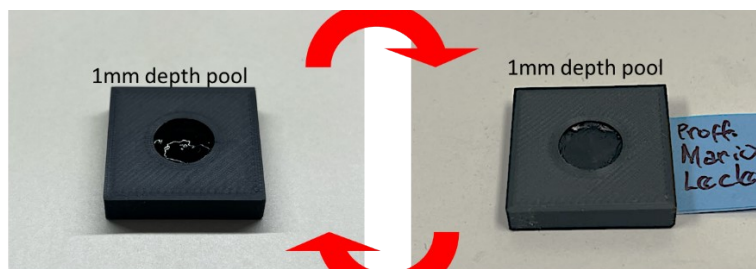

Pool filled with the polymer dispersed in water. The evaporation of the water is done at 40 C

Once the water is evaporated, the polymer precipitates a thin layer at the bottom. The pool is filled again. This process is repeated until reach a 1mm thickness.

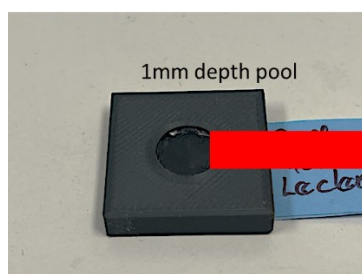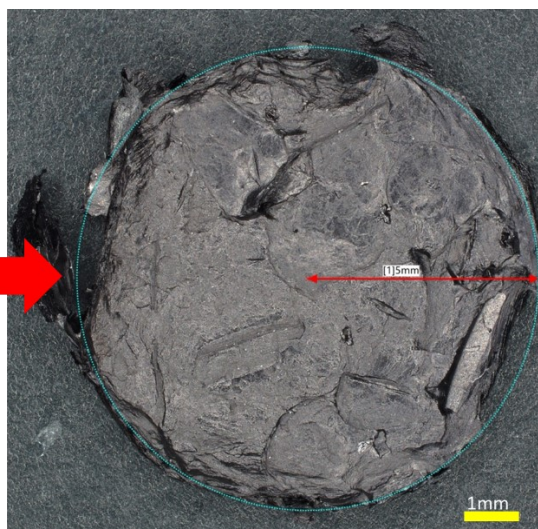

Pellet obtained after repeated evaporation and refilling of the 3D printed pools with the carbon-based polymer.

**Figure S2: Pellet preparation protocol for thermal conductivity measurement**

|            |            |              |                                  |
|------------|------------|--------------|----------------------------------|
| Project    | 2024-04-29 | Temp in °C   | 31.4                             |
| Material   | 300M       | Measnr       | 1111                             |
| Sample     | 4          | Thickness in | 0.05000                          |
| Atmosphere | Vacuum     |              | 2024-04-29_1_ETS_C-based_4_53.If |

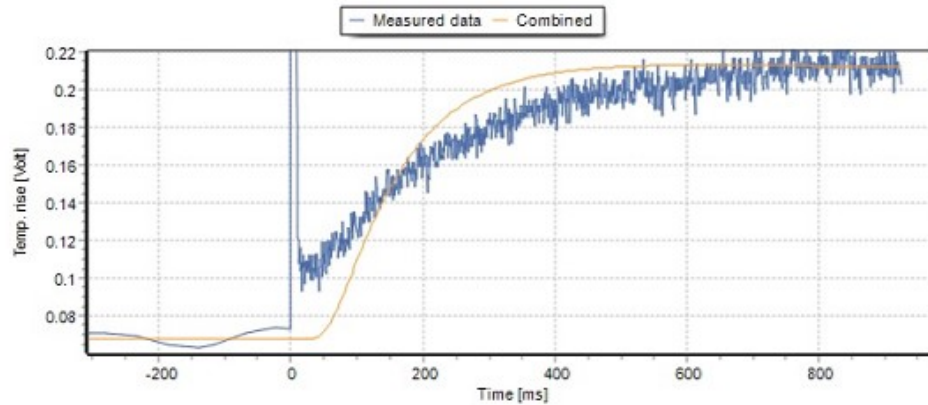

Details

|                |          |
|----------------|----------|
| Duration in s  | 0.925    |
| Max. in V      | 0.21     |
| Min. in V      | 0.068    |
| Halftime in ms | 128.944  |
| Min.type       | Baseline |
| Remark         |          |

Pulse in ms

|              |       |
|--------------|-------|
| Length       | 2.000 |
| Type         | Tri   |
| Trapez time1 | 0.200 |
| Trapez time2 | 1.800 |

Condition

|          |         |
|----------|---------|
| Operator | Alireza |
| Filter   | 0       |
| Iris     | 8       |
| Amp.     | 100     |

## Thermal diffusivity

Adiabatic results in cm<sup>2</sup>/s

|      |         |
|------|---------|
| Ave. | 0.00424 |
| 40   | 0.00329 |
| 50%  | 0.00269 |
| 60%  | 0.00234 |

Finite Pulse in cm<sup>2</sup>/s

|          |         |
|----------|---------|
| Dusza    | 0.00271 |
| Azumi    | 0.00271 |
| Clark    | 0.00271 |
| Combined |         |
| Dusza    | 0.00245 |

Heatloss in cm<sup>2</sup>/s

|            |         |
|------------|---------|
| Dusza      | 0.00245 |
| Gowan      | 0.00245 |
| Degiovanni | 0.00269 |
| Taylor     | 0       |
| Cowan 10   | 0.00269 |

Thermal diffusivity average value= 0.0025 cm<sup>2</sup> s<sup>-1</sup>

Figure S3: Analysis report
